# Supplementary material for: Impact of catalyst support on water-assisted CO oxidation over PdO/MO2 (M = Sn, Ti, and Si) catalysts: experimental and theoretical investigation
Source: Royal Society of Chemistry journal article supplement (doi:10.1039/d4nr03963g), 2024-01-01
Supplement: d4nr03963g1.pdf [file d4nr03963g1.pdf]

# **Impact of Catalyst Support on Water-Assisted CO Oxidation over PdO/MO<sub>2</sub> (M = Sn, Ti, Si) Catalysts: Experimental and Theoretical Investigation**

Kun Liu<sup>a\*</sup>, Luliang Liao<sup>b</sup>, Guangfu Liao<sup>c\*</sup>

<sup>a</sup>School of Resources and Environment, Nanchang University, 999 Xuefu Road, Nanchang, Jiangxi, 330031, China.

<sup>b</sup>Jiangxi Science Technology Normal University, Nanchang, Jiangxi, China.

<sup>c</sup>College of Materials Engineering, Fujian Agriculture and Forestry University, Fuzhou 350002, China.

\* Corresponding author. E-mail: [liukun@ncu.edu.cn](mailto:liukun@ncu.edu.cn) (K. Liu), [liaogf@mail2.sysu.edu.cn](mailto:liaogf@mail2.sysu.edu.cn) (G. Liao)

## **Content**

|                                                    |    |
|----------------------------------------------------|----|
| Content.....                                       | 2  |
| S1 Catalyst preparation and characterization ..... | 3  |
| S2 Characterization.....                           | 4  |
| S3. Supplementary Table.....                       | 7  |
| S4. References .....                               | 12 |

## S1 Catalyst preparation and characterization

### 1. Preparation of Catalyst Supports:

#### (1) TiO<sub>2</sub> Preparation:

Commercially purchased rutile-type nano titanium dioxide was calcined at 550 °C for 4 h, ground after removal, and used as the support.

#### (2) SiO<sub>2</sub> Preparation:

A solution was prepared by dissolving 14.211 g of sodium silicate in 100 mL of water. Nitric acid was slowly added to the sodium silicate solution at room temperature until precipitation suddenly increased. After 1 h of stirring, the precipitate was filtered, washed until total dissolved solids (TDS) < 20 mg/L, and dried at 110 °C for 6 h. Finally, it was calcined at 800 °C for 4 h harvesting the resulted support.

#### (3) SnO<sub>2</sub> Preparation:

SnO<sub>2</sub> prepared by chemical vapor deposition (CVD) method was washed with deionized water, filtered until TDS < 20 mg/L, and dried at 110 °C for later use.

### 2. Preparation of PdO Catalyst:

PdO catalysts (PdO/SiO<sub>2</sub>, PdO/TiO<sub>2</sub>, and PdO/SnO<sub>2</sub>) with a Pd loading of 2 wt% were prepared. 0.1143 g of Pd(NH<sub>3</sub>)<sub>4</sub> (NO<sub>3</sub>)<sub>2</sub> (Macklin, AR) was dissolved in 5 mL of deionized water, added to 1.9540 g of SiO<sub>2</sub> (TiO<sub>2</sub>, SnO<sub>2</sub>) support, and stirred for 6 hours at room temperature. The mixture was then evaporated at 60 °C, dried at 110 °C, and calcined at 400 °C with a heating rate of 2 °C min<sup>-1</sup> for 4 h. After cooling, the catalysts were ground and labeled accordingly.

### 3 Reaction rate calculation

Here are the formulas for calculating reaction rate ( $R_w$ ) and turnover frequency (TOF) as presented in this study:

#### Reaction rate ( $R_w$ ) formula:

$$R_w = \frac{RF \times V\% \times X_{CO}}{22.4 \times 60 \times m_{Cat.}} \quad (\text{mmol g}^{-1} \text{ s}^{-1}) \quad (1)$$

where: RF is the reaction gas flow rate (30 mL min<sup>-1</sup>).

V% the volume fraction of CO in the reaction gas (1%).

X<sub>CO</sub>: the CO conversion at 100 °C.

m<sub>Cat</sub>: the catalyst mass (0.1 g).

**Turnover frequency (TOF) formulas:**

$$R_{CO,Pd} = \frac{RF \times V\% \times X_{CO}}{22.4 \times 60 \times m_{Cat.} \times w_{Pd}} \text{ (mmol g}_{Pd}^{-1} \text{ s}^{-1}) \quad (2)$$

$$TOF = \frac{R_{CO,Pd} \times M_{Pd}}{D_{Pd}} \text{ (s}^{-1}) \quad (3)$$

where: w<sub>Pd</sub>: the loading of Pd.

M<sub>Pd</sub>: the relative atomic mass of Pd.

D<sub>Pd</sub>: the dispersion of surface Pd on the catalyst, typically determined using a 34.5% dispersed 0.5% Pt/Al<sub>2</sub>O<sub>3</sub> sample as a standard.

## S2 Characterization

Powder XRD patterns were recorded on a Bruker AXS D8 Focus diffractometer operating at 40 kV and 40 mA with Cu K $\alpha$  radiation. Scans were conducted over a 2 $\theta$  range from 10 to 90° with a step size of 2°/min. The mean crystallite sizes of the samples were calculated using the Scherrer equation based on the strongest peaks of PdO with the (111) hkl planes. The specific surface areas of the samples were determined by nitrogen adsorption-desorption at 77 K using an ST-08B instrument. Inductively coupled plasma-atomic emission spectroscopy (ICP-AES) was performed using an ICP-715ES (Varian) to determine the bulk elemental compositions of the samples. H<sub>2</sub>-TPR (Hydrogen Temperature-Programmed Reduction) experiments were performed on a FINESORB 3010C instrument in a 30 mL min<sup>-1</sup> flow of 10% H<sub>2</sub>/Ar gas mixture. The temperature was ramped from room temperature to 850 °C at a rate of 10 °C/min. Typically, 50 mg of catalyst was used for each test. A thermal conductivity detector (TCD) monitored H<sub>2</sub> consumption, and CuO (99.99%) was used as a calibration standard for quantifying H<sub>2</sub> consumption. XPS (X-ray Photoelectron Spectroscopy) measurements were carried out on a PerkinElmer PHI 1600 system using a single Mg

K $\alpha$  X-ray source operating at 300 W and 15 kV. Spectra were acquired at ambient temperature under ultrahigh vacuum conditions. Binding energies were calibrated using the C 1s peak of graphite at 284.5 eV as a reference. Carbon monoxide temperature-programmed desorption (CO-TPD) was conducted with a Micromeritics AutoChem 2920 apparatus to determine Pd dispersion and active Pd surface area on the reduced catalysts. Typically, 50 mg of catalyst was used for this test. The sample was reduced in pure hydrogen at 200 °C for 1 h, then cooled to 50 °C and maintained at this temperature for 1 h under a flowing 10% CO/Ar mixture. The sample was then purged with ultra-high purity Ar flow for 30 minutes. Subsequently, H<sub>2</sub> temperature-programmed desorption was performed from 50 °C to 500 °C in a 30 mL min<sup>-1</sup> ultra-high purity Ar flow to measure CO desorption. A 0.5% Pt/Al<sub>2</sub>O<sub>3</sub> standard with a metal dispersion of 34.5%, provided by Micromeritics, was used for calibration. Metallic Pd dispersion and surface area calculations were based on the stoichiometry of one hydrogen atom per palladium surface atom. Additional CO-TPD experiments were conducted using a Micromeritics ASAP2920 instrument to evaluate the CO adsorption properties of the catalysts. The experimental procedure was similar to the previous CO-TPD, except the catalysts were not reduced before CO adsorption. H<sub>2</sub>O temperature-programmed desorption (H<sub>2</sub>O-TPD) was performed on a DAS-7000 instrument to assess the effect of supports on the H<sub>2</sub>O adsorption behavior of the catalysts. Typically, 50 mg of catalyst was placed in a quartz reactor and pretreated in a 99.99% He flow at 300 °C for 2 hours, then cooled to 50 °C under He protection. The pretreated catalyst was saturated in a 30 mL min<sup>-1</sup> He flow passing through a water bubbler controlled at 30 °C for 1 hour. The sample was then purged with a 30 mL min<sup>-1</sup> He flow for 60 minutes to remove any physically adsorbed H<sub>2</sub>O at 50 °C. H<sub>2</sub>O-TPD was conducted from 50 °C to 300 °C with a heating rate of 10 °C min<sup>-1</sup> in a 30 mL min<sup>-1</sup> 99.99% He flow.

### **Activity evaluation**

The catalysts were evaluated for CO oxidation using a U-shaped quartz tube reactor with an inner diameter of 6 mm. The feed gas consisted of 1% CO, 22% O<sub>2</sub>, and

high-purity N<sub>2</sub> as the balance, with a total flow rate of 30 mL min<sup>-1</sup>. Typically, 25 mg of catalyst was used for activity evaluation, with a weight hourly space velocity (WHSV) of 72,000 mL·g<sup>-1</sup>·h<sup>-1</sup>. A K-type thermocouple was positioned at the top of the catalyst bed, with the thermocouple tip in direct contact with the catalyst to ensure accurate temperature measurement. To determine the light-off behavior of the catalysts, data were collected while incrementally increasing the temperature. The reactants and products were analyzed online using a GC9310 gas chromatograph equipped with a TDX-01 column and a thermal conductivity detector (TCD). Prior to analysis, the reaction at each temperature was stabilized for at least 30 minutes to obtain steady-state reaction data.

CO conversion (*X*<sub>CO</sub>) is calculated by the formula:

$$XCO = \frac{[CO]_{in} - [CO]_{out}}{[CO]_{in}} \times 100\%$$

where [CO]<sub>in</sub> and [CO]<sub>out</sub> are the concentrations of CO (vol %) at the reactor inlet and outlet, respectively.

### S3. Supplementary Table

**Table S1** Calculations and experimental values of lattice parameters for PdO, TiO<sub>2</sub>, and SnO<sub>2</sub>, along with corresponding crystal plane parameters.

|                        | Space group          | lattice parameters          |                             |
|------------------------|----------------------|-----------------------------|-----------------------------|
|                        |                      | Calculated value (Å)        | Experimental Value (Å)      |
| PdO                    | P4 <sub>2</sub> /mmc | a = b = 3.058,<br>c = 5.420 | a = b = 3.030,<br>c = 5.330 |
| TiO <sub>2</sub>       | P4 <sub>2</sub> /mnm | a = b = 4.570,<br>c = 2.990 | a = b = 4.594,<br>c = 2.959 |
| SnO <sub>2</sub>       | P4 <sub>2</sub> /mnm | a = b = 4.724,<br>c = 3.205 | a = b = 4.737,<br>c = 3.186 |
| PdO (101) R90          | —                    | a = 3.058, b = 6.223        | —                           |
| TiO <sub>2</sub> (110) | —                    | a = 2.990, b = 6.462        | —                           |
| SiO <sub>2</sub> (110) | —                    | a = 3.220, b = 6.740        | —                           |

**Table S2** Surface area and grain size of catalysts

| Samples              | Surface area (m <sup>2</sup> /g) <sup>[a]</sup> | Mean crystallite size of PdO (nm) <sup>[b]</sup> |
|----------------------|-------------------------------------------------|--------------------------------------------------|
| PdO/SnO <sub>2</sub> | 30                                              | 17                                               |
| PdO/TiO <sub>2</sub> | 25                                              | 13                                               |
| PdO/SiO <sub>2</sub> | 25                                              | 24                                               |
| SnO <sub>2</sub>     | 34                                              | -                                                |
| TiO <sub>2</sub>     | 27                                              | -                                                |
| SiO <sub>2</sub>     | 26                                              | -                                                |

<sup>[a]</sup> Baesd on BET method

<sup>[b]</sup> Baesd on Scherrer Equation

**Table S3** Catalyst surface reactivity in CO oxidation

| Samples                                | $E_a^a$<br>(kJ mol <sup>-1</sup> ) | $R_{w100}^b$<br>(10 <sup>-4</sup> mmol s <sup>-1</sup> g <sup>-1</sup> cat) | LnA   | TOF <sup>c</sup><br>(10 <sup>-2</sup> s <sup>-1</sup> ) |
|----------------------------------------|------------------------------------|-----------------------------------------------------------------------------|-------|---------------------------------------------------------|
| PdO/SnO <sub>2</sub>                   | 61.3                               | 5.41                                                                        | 9.42  | 9.82                                                    |
| PdO/SnO <sub>2</sub> -H <sub>2</sub> O | 52.5                               | 9.66                                                                        | 12.83 | 17.53                                                   |
| PdO/TiO <sub>2</sub>                   | 21.9                               | 28.87                                                                       | 3.91  | 15.57                                                   |
| PdO/TiO <sub>2</sub> -H <sub>2</sub> O | 30.2                               | 10.49                                                                       | 0.22  | 5.66                                                    |
| PdO/SiO <sub>2</sub>                   | 145.9                              | ~ 0                                                                         | 31.32 | ~ 0                                                     |
| PdO/SiO <sub>2</sub> -H <sub>2</sub> O | 198.5                              | ~ 0                                                                         | 44.27 | ~ 0                                                     |

<sup>a</sup>  $E_a$ : apparent activation energy.

<sup>b</sup>  $R_{w100}$ ,  $R_{w80}$ : the differential reaction rates normalized by weight of catalysts at 100 °C and listed as formula in **S1 section**

<sup>c</sup> TOF : listed as formula in **S1 section**.

**Table S4** Quantitative results of XPS, ICP, and dispersion testing.

| Catalyst             | O <sub>1s</sub> Binding<br>[ <sup>a</sup> ] |                   | $\frac{O_{ads}}{O_{ads} + O_{latt}}$<br>[ <sup>a</sup> ] | Pd contents<br>by ICP<br>(wt%) [ <sup>b</sup> ] | Surface Pd<br>contents<br>by XPS<br>(wt%) [ <sup>a</sup> ] | Pd<br>dispersion<br>(%) |
|----------------------|---------------------------------------------|-------------------|----------------------------------------------------------|-------------------------------------------------|------------------------------------------------------------|-------------------------|
|                      | Energy(eV)                                  |                   |                                                          |                                                 |                                                            |                         |
|                      | O <sub>ads</sub>                            | O <sub>latt</sub> |                                                          |                                                 |                                                            |                         |
| PdO/SnO <sub>2</sub> | 531.8                                       | 530.5             | 31.96%                                                   | 1.69                                            | 2.31                                                       | 3.47                    |
| PdO/TiO <sub>2</sub> | 531.5                                       | 529.3             | 47.70%                                                   | 1.64                                            | 4.76                                                       | 12.03                   |
| PdO/SiO <sub>2</sub> | 532.8                                       | 531.9             | 31.96%                                                   | 1.75                                            | 1.08                                                       | 2.00                    |

[<sup>a</sup>] Baesd on XPS results

[<sup>b</sup>] Baesd on ICP results



**Table S5** Surface H<sub>2</sub>O-TPD and CO-TPD Quantitative Analysis

|                      | H <sub>2</sub> O desorption amount (a.u.) |              | CO desorption amount (a.u.) |
|----------------------|-------------------------------------------|--------------|-----------------------------|
|                      | 50 ~ 170 °C                               | 171 ~ 360 °C |                             |
| PdO/SnO <sub>2</sub> | 1308                                      | 1759         | 1937                        |
| PdO/TiO <sub>2</sub> | 2060                                      | 3676         | 2013                        |
| PdO/SiO <sub>2</sub> | 1121                                      | —            | 785                         |

**Table S6** Adsorption of OH and H<sub>2</sub>O on catalyst and carrier surfaces, and dissociation of H<sub>2</sub>O

| Samples              | OH Adsorption capacity (eV) | H <sub>2</sub> O Adsorption capacity (eV) | H <sub>2</sub> O Activation energy (eV) | H <sub>2</sub> O Dissociation activation barrier (eV) |
|----------------------|-----------------------------|-------------------------------------------|-----------------------------------------|-------------------------------------------------------|
| PdO                  | 3.33                        | 1.01                                      | 0.26                                    | —                                                     |
| PdO/TiO <sub>2</sub> | 3.34                        | 1.16                                      | 0.35                                    | 0.48                                                  |
| PdO/SnO <sub>2</sub> | 2.89                        | 1.12                                      | 0.31                                    | 0.40                                                  |

**Table S7** Surface CO adsorption structure parameters and Bader charge variation on catalysts.

| Catalysts surface                      | Adsorption site | Adsorption energy (eV) | d (Å)            |                     |                    |       | Δq (e)           |                   |                  |
|----------------------------------------|-----------------|------------------------|------------------|---------------------|--------------------|-------|------------------|-------------------|------------------|
|                                        |                 |                        | C–O              | C–Pd <sub>cus</sub> | C–O <sub>cus</sub> | CO    | H <sub>2</sub> O | Pd <sub>cus</sub> | O <sub>cus</sub> |
| PdO                                    | Pd-top          | 1.66                   | 1.150            | 1.885               | —                  | -0.04 | —                | -0.06             | —                |
| PdO-H <sub>2</sub> O                   | Pd-top          | 1.59                   | 1.154<br>(2.854) | 1.879               | —                  | 0     | -0.12            | -0.08             | —                |
| PdO-H-OH                               | Pd-top          | 1.63                   | 1.149            | 1.894               | —                  | -0.06 | -0.19            | -0.09             | —                |
| PdO/TiO <sub>2</sub>                   | Pd-O bridging   | 2.08                   | 1.227            | 1.927               | 1.308              | -0.48 | —                | +0.18             | +0.29            |
| PdO/TiO <sub>2</sub> -H <sub>2</sub> O | Pd-O bridging   | 2.34                   | 1.241<br>(1.795) | 1.929               | 1.303              | -0.45 | -0.13            | +0.20             | +0.34            |
| PdO/TiO <sub>2</sub> -H-OH             | Pd-O bridging   | 2.05                   | 1.224            | 1.930               | 1.313              | -0.50 | -0.22            | +0.19             | +0.31            |
| PdO/SnO <sub>2</sub>                   | Pd-O bridging   | 2.13                   | 1.228            | 1.917               | 1.312              | -0.50 | —                | +0.19             | +0.31            |
| PdO/SnO <sub>2</sub> -H <sub>2</sub> O | Pd-O bridging   | 2.39                   | 1.246<br>(1.807) | 1.916               | 1.301              | -0.44 | -0.15            | +0.20             | +0.35            |
| PdO/SnO <sub>2</sub> -H-OH             | Pd-O bridging   | 2.09                   | 1.226            | 1.920               | 1.317              | -0.47 | -0.20            | +0.18             | +0.30            |

**Note:** The bond length in the parentheses is the distance from O in the adsorption structure of CO to the closer H in the H<sub>2</sub>O molecule.

**Table S8** The reaction enthalpy (ΔH) and activation energy barriers for the surface oxygen extraction process on PdO/TiO<sub>2</sub> and PdO/SnO<sub>2</sub> catalysts during CO oxidation.

| Small molecules     | PdO/TiO <sub>2</sub> |         | PdO/SnO <sub>2</sub> |         |
|---------------------|----------------------|---------|----------------------|---------|
|                     | Energy barrier (eV)  | ΔH (eV) | Energy barrier (eV)  | ΔH (eV) |
| CO                  | 0.83                 | 0.30    | 1.33                 | 1.15    |
| H <sub>2</sub> O-CO | 1.25                 | 1.18    | 1.48                 | 1.28    |
| H-OH-CO             | 1.37                 | 0.97    | 1.25                 | 0.91    |

**Table S9** A literature summary of non-noble and noble metal catalysts in CO oxidation

| Entry                            | Cat.                                                        | S <sub>BET</sub><br>(m <sup>2</sup> /g) | Reaction condition |                         | Temp. for conversion. (°C) |     |     | Ref       |
|----------------------------------|-------------------------------------------------------------|-----------------------------------------|--------------------|-------------------------|----------------------------|-----|-----|-----------|
|                                  |                                                             |                                         | P                  | GHSV                    | T10                        | T50 | T90 |           |
|                                  |                                                             |                                         | (bar)              | (mL/g <sub>cat</sub> h) |                            |     |     |           |
| <b>Non-noble metal catalysts</b> |                                                             |                                         |                    |                         |                            |     |     |           |
| 1                                | Mn5Co1O <sub>x</sub> -800                                   | 10                                      | 1                  | -                       | 300                        | -   | -   | 1         |
| 2                                | Mn5Co1O <sub>x</sub> -600                                   | 21                                      | 1                  | -                       | 175                        | 250 | 315 | 1         |
| 3                                | Mn5Co1O <sub>x</sub> -400                                   | 60                                      | 1                  | -                       | 140                        | 190 | 215 | 1         |
| 4                                | Co <sub>3</sub> O <sub>4</sub> /SiO <sub>2</sub> (particle) | 11                                      | 1                  | 120 000                 | 100                        | 140 | 170 | 2         |
| 5                                | Co <sub>3</sub> O <sub>4</sub> /SiO <sub>2</sub> (cuber)    | -                                       | 1                  | 120 000                 | 180                        | 225 | -   | 2         |
| 6                                | Co <sub>3</sub> O <sub>4</sub> /SiO <sub>2</sub> (sheets)   | 14                                      | 1                  | 120 000                 | 115                        | 165 | -   | 2         |
| 7                                | Mn-SBA-15                                                   | 403                                     | 1                  | 6000                    | 92                         | 135 | 158 | 3         |
| 8                                | 1Co2Mn-SBA-15                                               | 349                                     | 1                  | 6000                    | 170                        | 220 | 250 | 3         |
| 9                                | Co <sub>3</sub> O <sub>4</sub>                              | -                                       | 1                  | 6000                    | 80                         | 130 | 150 | 4         |
| 10                               | CeO <sub>2</sub>                                            | -                                       | 1                  | 6000                    | 190                        | 250 | 300 | 4         |
| 11                               | MnO                                                         | 18                                      | 1                  | -                       | 245                        | 325 | 345 | 5         |
| 12                               | 4%Co-MnO                                                    | -                                       | 1                  | -                       | 125                        | 135 | 145 | 5         |
| <b>Noble metal catalysts</b>     |                                                             |                                         |                    |                         |                            |     |     |           |
| 13                               | Ir/Al <sub>2</sub> O <sub>3</sub>                           | -                                       | 1                  | 40000                   | 180                        | -   | -   | 6         |
| 14                               | Ir/Fe <sub>2</sub> O <sub>3</sub>                           | -                                       | 1                  | 40000                   | 90                         | -   | -   | 6         |
| 15                               | Pt/CeO <sub>2</sub>                                         | -                                       | 1                  | 39960                   | 275                        | 325 | 375 | 7         |
| 16                               | Pd/CeO <sub>2</sub>                                         | -                                       | 1                  | 39960                   | 100                        | 275 | 325 | 7         |
| 17                               | Rh/CeO <sub>2</sub>                                         | -                                       | 1                  | 39960                   | 75                         | 120 | 140 | 7         |
| 18                               | 0.6% Pt/Fe-C4                                               | 66.1                                    | 1                  | 18750                   | -                          | -   | 30  | 8         |
| 19                               | 3PdCe-600                                                   | -                                       | 1                  | 240000                  | 45                         | 90  | 130 | 9         |
| 20                               | 3PdCe-700                                                   | -                                       | 1                  | 240000                  | 25                         | 75  | 110 | 9         |
| 21                               | Pd/TiO <sub>2</sub>                                         | 25                                      | 1                  | 72000                   | 60                         | 100 | 110 | This work |

## S4. References

1. O. A. Bulavchenko, T. N. Afonassenko, S. S. Sigaeva, A. V. Ivanchikova, A. A. Saraev, E. Y. Gerasimov, V. V. Kaichev, S. V. Tsybulya, *Top. Catal.*, 2020, **63**, 75-85.
2. M. Khasu, T. Nyathi, D. J. Morgan, G. J. Hutchings, M. Claeys, N. Fischer, *Catal. Sci. Technol.*, 2017, **7**, 4806-4817.
3. S. Todorova, J. L. Blin, A. Naydenov, B. Lebeau, H. Kolev, P. Gaudin, A. Dotzeva, R. Velinova, D. Filkova, I. Ivanova, L. Vidal, L. Michelin, L. Josien, K. Tenchev, *Catal., Today*, 2020, **357**, 602-612.
4. W. Huan, J. Li, J. Ji, M. Xing, *Chin. J. Catal.*, 2019, **40**, 656-663.
5. H. Yu, L. Yi, F. Jiang, X. Wang, K. Xie, *Catal. Sci. & Technol.*, 2023, **13**, 750-757.
6. W. Zhang, A. Wang, L. Li, X. Wang, T. Zhang, *Catal. Today.*, 2008, **131**, 457-463.
7. B. Han, T. Li, J. Zhang, C. Zeng, H. Matsumoto, Y. Su, B. Qiao, T. Zhang, *Chem. Commun.*, 2020, **56**, 4870-4873.
8. B. Qiao, A. Wang, L. Li, Q. Lin, H. Wei, J. Liu, T. Zhang, *ACS Catal.*, 2014, **4**, 2113-2117.
9. R. V. Gulyaev, E. M. Slavinskaya, S. A. Novopashin, D. V. Smovzh, A. V. Zaikovskii, D. Y. Osadchii, O. A. Bulavchenko, S. V. Korenev, A. I. Boronin, *Appl. Catal. B: Environ.*, 2014, **147**, 132-143.
